# Supplementary material for: Dysregulation of astrocytic DNAJC6 contributes to sporadic Parkinson’s disease pathogenesis
Source: JCI journal article supplement (doi:10.1172/jci194989), 2026-04-09

## **Supplementary Materials and Methods**

### **Chromatin immunoprecipitation-quantitative PCR (ChIP-qPCR)**

NURR1 and FOXA2 binding sites in the human DNAJC6 promoter were identified using the Jaspar database (<http://jaspar.genereg.net>) and an 80% score threshold. Predicted NURR1 and FOXA2 binding sites were coupled with phylogenetic footprinting to eliminate spurious predictions with specified position weight matrix (PWM) settings. ChIP assays were carried out as previously described (1). Briefly, chromatin was sheared to an average of 200–500 base pairs (bp) using a sonicator (Bioruptor-BMS, Seoul, Korea) and immunoprecipitated using the antibodies listed in Supplementary Table S3. Immunoprecipitated DNA fragments were collected using magnetic beads (Invitrogen), purified, and subjected to real-time PCR using the primers listed in Supplementary Table S4. The comparative cycle threshold method was used to quantify the results. Data were normalized to the input DNA.

### **Endosomal uptake assay using FM 1-43 styryl dye**

Cells were initially rinsed and then exposed to HBSS supplemented with Ca<sup>2+</sup> for 10 minutes at 37°C. Subsequently, the buffer was removed, and the cells were treated with HBSS containing Ca<sup>2+</sup> and 60 mM KCl, supplemented with 5 µg/mL FM 1-43FX styryl dye (Thermo Fisher), for 1 minute at 37°C. Following this, cells were further incubated in HBSS with Ca<sup>2+</sup> and 5 µg/mL FM 1-43FX styryl dye for an additional 15 minutes at 37°C, swiftly washed twice with PBS, and left to incubate overnight at 4 °C. The following day, cell fixation was carried out using 3% PFA for 20 minutes, followed by mounting in Vectashield medium containing DAPI (Vector Laboratories, West Grove, PA). Imaging was performed utilizing a confocal microscope.

### **Auto-lysosomal assays**

Auto-lysosomal activity was determined by WB-based determination of the protein levels for LC3 and p62 in the absence and presence of the lysosomal inhibitor Bafilomycin A (Selleck Chem. LLC, Houston, TX). Bafilomycin A was applied for 48hr after 7 days of differentiation.

### **Mitochondrial Assay**

MitoTimer analysis was performed by transducing cells with lentiviruses carrying the mitotimer vector (mitochondrial-targeting sequences of the human cytochrome *c* oxidase subunit VIII gene fused with a timer-reporter gene (DsRed1-E5)) (Addgene #52659). Mitophagy analysis using MitoKeima was performed by transducing cells with lentivirus carrying mitochondrial-targeting sequence of the human cytochrome *c* oxidase subunit VIII (Cox8) gene fused with coral-derived protein Keima (2). Mitochondria ROS was evaluated using MitoSOX Red (Invitrogen, M36008) as described previously(1).

### **GBA Lysosomal Activity Assay**

Lysosomal GBA activity was measured as described previously (1) with slight modifications. Cells were collected in ice-cold lysosome isolation buffer, homogenized through a 27-gauge syringe, and centrifuged at  $1,000 \times g$  for 10 min (4 °C). The post-nuclear supernatant was combined with enrichment buffer and centrifuged to obtain lysosomal pellets. 10  $\mu$ g lysosomal protein was incubated with 1 mM 4-MUG in assay buffer (0.25% sodium taurocholate, 0.1 M sodium citrate, pH 5.6) at 37 °C for 2 h. Reactions were stopped with glycine buffer (pH 10) and fluorescence recorded (Ex 355 nm/Em 460 nm). CBE-sensitive activity was determined after 24 h pre-incubation with 50  $\mu$ M conduritol-B-epoxide, and relative GBA1 activity calculated by subtracting CBE-treated from untreated samples.

### **Cytosolic mitochondrial DNA (mtDNA) determination**

Isolation and quantification of mitochondrial DNA in cytosolic extract and whole cell extract (WCE) were performed as previously described (3). Measure the DNA concentration of each fraction. Purity tests of each fraction were done by performing western blot of each fraction against GAPDH (cytosolic extract), TFAM (mitochondrial extract), and Lamin (nuclear extract). If fractions are free of cross-contamination as determined by western blot analysis, 2 ng/ $\mu$ L in nuclease-free water were subjected to qPCR analysis. Calculation of mtDNA abundance relative to nuclear DNA were performed using the delta delta Cq ( $\Delta\Delta Cq$ ) method.

### **Detection of MAVS Aggregation**

MAVS aggregation was analyzed using semi-denaturing detergent agarose gel electrophoresis (SDD-AGE), as previously described (4). Briefly, mitochondrial extracts were resuspended in  $1 \times$

sample buffer (0.5× TBE, 10% glycerol, 2% SDS, and 0.0025% bromophenol blue) and loaded onto a vertical 1.5% agarose gel. Electrophoresis was performed at 100 V for 35 minutes at 4°C using running buffer (1× TBE, 0.1% SDS). Proteins were then transferred to an Immobilon membrane (Millipore) for immunoblotting with a MAVS antibody (Supplementary Table S3). Additionally, MAVS aggregates were detected via immunofluorescence staining using the MAVS antibody (Supplementary Table S3), and MAVS-stained puncta were quantified.

### **Western blot analysis**

Total cellular proteins were extracted in a RIPA buffer containing protease inhibitor (Roche) and phosphatase inhibitor cocktails (Sigma). Mitochondrial proteins were prepared as previously described (3). To detect aggregate forms of  $\alpha$ -syn, protein was extracted from cultured cells using a 1% Triton X-100/PBS buffer containing a protease inhibitor (Roche) and phosphatase inhibitor cocktails (Sigma). After centrifugation (16,000 g, 10 min), the Triton X-100 supernatant was collected (Triton X-100-soluble). The pellet was dissolved in 1% SDS sample buffer and then briefly sonicated (Triton X-100-insoluble protein, SDS-soluble protein). Protein samples (15–40  $\mu$ g of protein) were electrophoresed on SDS-PAGE gels (6–20% gradient), transferred to a nitrocellulose membrane, blocked with 5% BSA/PBS, and then incubated with primary antibodies (overnight, 4°C) (listed in Supplementary Table S3). The next day, the secondary antibodies treatment occurred for 1 h. Signals were captured with ChemiDoc (Bio-Rad Laboratories) and quantification was performed using ImageJ (NIH, Bethesda, MD).

For immunoprecipitation, cell lysates from the triple *in-vitro* PD model were used. Protein concentration was determined using a BCA assay and normalized to 2 mg/ml prior to the IP experiments. Each sample was incubated with an anti-LRRK2 (ab181386; Abcam) antibody and the Co-immunoprecipitation (Co-IP) was performed using the Thermo Scientific Pierce Crosslink IP/Co-IP Kit (Cat. # 88,805) following the manufacturer's protocol.

### **Proximity ligation assay (PLA)**

Protein interactions were detected using the Duolink® PLA kit (Merck) following manufacturer protocols and analyzed by confocal microscopy.

### **RNA extraction, reverse transcription, and qRT-PCR**

Total RNAs were isolated using TRIzol Reagent (Invitrogen), and reverse-transcribed using the SuperScript III kit (Invitrogen) to make cDNA. Transcript abundance was determined by qRT-PCR using SYBR Green PCR mix (Bio-Rad) and performed using CFX Connect Real-Time System (Bio-Rad). The  $\Delta\Delta C_q$  method was used to normalize expression levels of each gene to that of GAPDH. Primers used are listed in Supplementary Table S4.

### **Immunofluorescence staining for cultured cells and mouse brain sections**

Cultured cells were fixed with 4% paraformaldehyde (PFA) in PBS for 20 min, washed, and blocked in 0.3% Triton X-100 with 1% BSA for 40 min. Mice were anesthetized and perfused transcardially with 4% PFA. Brains were removed and immersed in 30% sucrose in PBS until sank, frozen in Tissue-Tek (Sakura Finetek), and sliced (30  $\mu\text{m}$  thick) on a freezing microtome (Leica). The culture cells and brain sections were incubated with primary antibodies at 4°C overnight, followed by incubation with secondary antibodies for 1 h at room temperature. Primary and secondary antibody information is shown in Supplementary Table S3. The stained cells /sections were mounted with Vectashield (Vector Laboratories, Burlingame, CA, USA) and DAPI mounting solution. Images were obtained using an epifluorescence microscope (Leica) or confocal microscope (Leica TCS SP5 confocal).

### **Analysis of Astrocyte and Microglia Morphology**

Morphological analysis was performed using Fiji (v1.54). Maximum-intensity Z-projections were thresholded to create binary masks for each cell, from which cell area and circularity were measured. Skeletonized images were analyzed with the Analyze Skeleton plugin to quantify branching morphology. For each mouse, a minimum of 15 cells was analyzed.

### **Immunostaining of Human Postmortem Brain Tissue**

Postmortem brain samples from normal and Parkinson's disease (PD) subjects were generously provided by the Boston University Alzheimer's Disease Research Center (BUADRC) (more information for in Supplementary Table S5). The brain tissues were embedded in paraffin and sectioned coronally at a thickness of 20  $\mu\text{m}$ . Sections were deparaffinized using three consecutive xylene baths (5 minutes each) and then rehydrated through a graded ethanol series (100%, 95%,

80%, and 60%, each for 5 minutes). To quench endogenous peroxidase activity, sections were incubated with 3% hydrogen peroxide in TBS for 15 minutes at room temperature. To detect DNAJC6 expression, sections were blocked with 5% goat serum in PBS for 1 hour, followed by incubation with a DNAJC6 antibody (1:50 dilution, Proteintech; 21941-1-AP) for 48 hours. After three PBS washes, sections were incubated with the ImmPRESS-AP anti-rabbit IgG (alkaline phosphatase) polymer detection reagent (Vector Laboratories, MP-5402) for 30 minutes at room temperature. DNAJC6 signals were visualized using the Vector Red alkaline phosphatase substrate kit (Vector Laboratories). The slides were then washed three times with PBS and processed using the Vector ABC Kit (Vector Laboratories, Burlingame, CA, USA). To assess DNAJC6 expression in astrocytes, sequential immunostaining for GFAP and DNAJC6 was performed. Sections were first blocked with 2.5% normal horse serum (Vector Laboratories) for 1 hour and incubated with a GFAP antibody(1:200 dilution, AB554) for 24 hours. After three PBS washes, the GFAP immunoreactive signals were developed using the Vector ABC Kit and DAB chromogen (Thermo Fisher Scientific, Meridian, Rockford, IL, USA). Following GFAP staining, DNAJC6 immunostaining was performed on the same sections using the protocol described above. Double-stained tissue slides were then sequentially dehydrated through an ethanol series (60%, 80%, 90%, and 100%, each for 5 minutes), immersed in xylene baths (two times, 5 minutes each), and mounted for imaging.

## References

1. Wulansari N, Darsono WHW, Woo HJ, Chang MY, Kim J, Bae EJ, et al. Neurodevelopmental defects and neurodegenerative phenotypes in human brain organoids carrying Parkinson's disease-linked DNAJC6 mutations. *Sci Adv.* 2021;7(8).
2. Sun N, Malide D, Liu J, Rovira, II, Combs CA, and Finkel T. A fluorescence-based imaging method to measure in vitro and in vivo mitophagy using mt-Keima. *Nature protocols.* 2017;12(8):1576-87.
3. Bryant JD, Lei Y, VanPortfliet JJ, Winters AD, and West AP. Assessing Mitochondrial DNA Release into the Cytosol and Subsequent Activation of Innate Immune-related Pathways in Mammalian Cells. *Curr Protoc.* 2022;2(2):e372.
4. Hou F, Sun L, Zheng H, Skaug B, Jiang QX, and Chen ZJ. MAVS forms functional prion-like aggregates to activate and propagate antiviral innate immune response. *Cell.* 2011;146(3):448-61.

## Supplementary Tables

**Table S1. Human ESC and Human iPSC used in this study**

| Name                  | Cell Lines Identifier | Mutation                                 | Establishing Institute                               |
|-----------------------|-----------------------|------------------------------------------|------------------------------------------------------|
| H9 hESC               | WA09                  | -                                        | WiCell                                               |
| WT iPSC               | -                     | -                                        | Dr. Mark Cookson's Lab (National Institute on Aging) |
| LRRK2 G2019S<br>PL2A9 | NIAi001-C             | G2019S homozygous mutation in LRRK2 gene | Dr. Mark Cookson's Lab (National Institute on Aging) |
| LRRK2 R1441C<br>PL2F5 | NIAi001-G             | R144C homozygous mutation in LRRK2 gene  | Dr. Mark Cookson's Lab (National Institute on Aging) |
| LRRK2 N1437H<br>PL3D7 | NIAi001-I             | N1437H homozygous mutation in LRRK2 gene | Dr. Mark Cookson's Lab (National Institute on Aging) |
| LRRK2 K1960M<br>PL2H7 | NIAi001-K             | K1960M homozygous mutation in LRRK2 gene | Dr. Mark Cookson's Lab (National Institute on Aging) |

**Table S2. Virus list used in this study**

| Virus type                                 | Vector                                          | Promoter     | Target gene               | Note1                           | Note2                       |
|--------------------------------------------|-------------------------------------------------|--------------|---------------------------|---------------------------------|-----------------------------|
| Lentivirus                                 | pEF1 $\alpha$ - human $\alpha$ -synuclein       | EF1 $\alpha$ | human $\alpha$ -synuclein |                                 | Conventional overexpression |
|                                            | pEF1 $\alpha$ - <i>DNAJC6</i> gRNA1,2           | EF1 $\alpha$ | <i>DNAJC6</i>             | <i>DNAJC6</i> gRNA1,2           | CRISPR-knockdown            |
|                                            | pEF1 $\alpha$ - <i>DNAJC6</i> gRNA3,4           |              |                           | <i>DNAJC6</i> gRNA3,4           |                             |
|                                            | pEF1 $\alpha$ -Cas13d (Cas-RX)                  |              |                           | Cas13d (Cas-RX)                 |                             |
|                                            | pEF1 $\alpha$ - <i>DNAJC6</i> gRNA1,2-dCas-VP64 | EF1 $\alpha$ | <i>DNAJC6</i>             | <i>DNAJC6</i> gRNA1,2 dCas-VP64 | CRISPR-overexpression       |
|                                            | pEF1 $\alpha$ - <i>DNAJC6</i> gRNA3,4-dCas-VP64 |              |                           | <i>DNAJC6</i> gRNA3,4 dCas-VP64 |                             |
|                                            | pSynapsin- <i>DNAJC6</i> gRNA1,2-dCas-VP64      | Synapsin     | <i>DNAJC6</i>             | <i>DNAJC6</i> gRNA1,2 dCas-VP64 | CRISPR-overexpression       |
| pSynapsin- <i>DNAJC6</i> gRNA1,2-dCas-VP64 | <i>DNAJC6</i> gRNA3,4 dCas-VP64                 |              |                           |                                 |                             |

|                       |                                                      |                 |                                   |                       |                                           |
|-----------------------|------------------------------------------------------|-----------------|-----------------------------------|-----------------------|-------------------------------------------|
| AAV2                  | p <i>Synapsin</i> -human $\alpha$ - <i>synuclein</i> | Synapsin        | human $\alpha$ - <i>synuclein</i> |                       | Conventional overexpression               |
| AAV9                  | p <i>Synapsin</i> -human $\alpha$ - <i>synuclein</i> | Synapsin        | human $\alpha$ - <i>synuclein</i> |                       | Conventional overexpression               |
|                       | pCMV- <i>DNAJC6</i> gRNA1,2                          | CMV             | <i>DNAJC6</i>                     | <i>DNAJC6</i> gRNA1,2 | CRISPR-overexpression (CRISPR-SAM)        |
|                       | pCMV- <i>DNAJC6</i> gRNA3,4                          |                 |                                   | <i>DNAJC6</i> gRNA3,4 |                                           |
|                       | pCMV-dCas-VP64                                       |                 |                                   | dCas-VP64             |                                           |
| pCMV-MS2- <i>TET1</i> | MS2- <i>TET1</i>                                     |                 |                                   |                       |                                           |
| AAV5                  | p <i>gfaABC1D</i> - <i>DNAJC6</i> gRNA1,2            | <i>gfaABC1D</i> | <i>DNAJC6</i>                     | <i>DNAJC6</i> gRNA1,2 | CRISPR-overexpression system (CRISPR-SAM) |
|                       | p <i>gfaABC1D</i> - <i>DNAJC6</i> gRNA3,4            |                 |                                   | <i>DNAJC6</i> gRNA3,4 |                                           |
|                       | p <i>gfaABC1D</i> -dCas-VP64                         |                 |                                   | dCas-VP64             |                                           |
|                       | p <i>gfaABC1D</i> -MS2- <i>TET1</i>                  |                 |                                   | MS2- <i>TET1</i>      |                                           |

**Table S3. Antibody list used in this study**

| Target                                       | # Catalog     | Company            | Working conc. |
|----------------------------------------------|---------------|--------------------|---------------|
| <b>Primary Antibody for immunostaining</b>   |               |                    |               |
| DNAJC6                                       | 21941-1-AP    | proteintech        | 1:50          |
| NURR1                                        | PP-N1404-0C   | R&D system         | 1:1000        |
| FOXA2                                        | sc-374376     | Santa-cruz         | 1:1000        |
| LAMP1                                        | ab25630       | abcam              | 1:200         |
| TUJ1                                         | 801202        | biolegend          | 1:1000        |
| Calnexin                                     | adi-spa-860-d | Enzo life sciences | 1:500         |
| phospho-synuclein (phospho S129)             | 825701        | biolegend          | 1:20,000      |
| TH                                           | P40101-150    | Pel-Freez          | 1:1000        |
| GFAP                                         | AB5541        | Millipore          | 1:1000        |
| MAP2                                         | M1406         | Millipore          | 1:1000        |
| Iba1                                         | 019-19741     | Wako               | 1:500         |
| GBA                                          | ab55080       | abcam              | 1:500         |
| Synapsin1                                    | Ab1543        | abcam              | 1:1000        |
| CD11b                                        | CBL1512       | Millipore          | 1:200         |
| CD68                                         | MAB1435       | Millipore          | 1:200         |
| <b>Secondary Antibody for immunostaining</b> |               |                    |               |
| Alexa Fluor 488 goat anti-rabbit             | A11008        | Thermo Scientific  | 1:1000        |
| Alexa Fluor 488 goat anti-mouse              | A11001        | Thermo Scientific  | 1:1000        |

|                                              |                  |                   |          |
|----------------------------------------------|------------------|-------------------|----------|
| Alexa Fluor 546 donkey anti-rabbit           | A10040           | Thermo Scientific | 1:1000   |
| Alexa Fluor 546 goat anti-mouse              | A11003           | Thermo Scientific | 1:1000   |
| Alexa Fluor 647 goat anti-chicken            | A21449           | Thermo Scientific | 1:1000   |
| <b>Primary Antibody for western blot</b>     |                  |                   |          |
| DNAJC6                                       | HPA031182        | Atlas-antibodies  | 1:1000   |
| GAPDH                                        | sc-47724         | Santa-cruz        | 1:1000   |
| LRRK2 (phospho S935)                         | ab133450         | Abcam             | 1:1000   |
| LRRK2                                        | ab181386         | Abcam             | 1:1000   |
| $\beta$ -actin                               | MA1-140          | invitrogen        | 1:50,000 |
| LC3b                                         | nb100-2220       | novusbio          | 1:1000   |
| P62                                          | pm045            | MBL               | 1:3000   |
| TBK1                                         | #3504            | Cell Signaling    | 1:1000   |
| Phospho-TBK1                                 | #5483            | Cell Signaling    | 1:1000   |
| IRF3                                         | #4302            | Cell Signaling    | 1:1000   |
| Phospho-IRF3                                 | #29047           | Cell Signaling    | 1:1000   |
| STING                                        | ab92605          | abcam             | 1:1000   |
| cGAS                                         | #31659           | Cell Signaling    | 1:1000   |
| NLRP3                                        | ag-20b-0014-c100 | AdipoGen          | 1:1000   |
| ASC                                          | 13833s           | Cell Signaling    | 1:1000   |
| Caspase-1                                    | AG-20B-0042-C100 | AdipoGen          | 1:1000   |
| MAVS                                         | Sc-166583        | Santa-cruz        | 1:1000   |
| <b>Secondary Antibody for immunostaining</b> |                  |                   |          |
| Anti-rabbit IgG, HRP                         | #7074            | Cell Signaling    | 1:1000   |
| Anti-mouse IgG, HRP                          | #7076            | Cell Signaling    | 1:1000   |

Table S4. Primer sequences used in this study

| Target                             | Primer (Forward)        | Primer (Reverse)      |
|------------------------------------|-------------------------|-----------------------|
| <b>qPCR Primer for Human Genes</b> |                         |                       |
| <i>GAPDH</i>                       | TTGAGGTCAATGAAGGGGTC    | GAGGTGAAGGTCGGAGTCA   |
| <i>DNAJC6</i>                      | AGGCATTACGGACAAAGTGG    | TTTTGCTGGGCTTCTTGACT  |
| <i>FOXA2</i>                       | TACGACGACATGTTTCATGGAGC | TATGCTGGGAGCGGTGAAGA  |
| <i>GFAP</i>                        | CAGGAAGCAGATGAAGCC      | GACGCCATTGCCTCATA     |
| <i>IL1b</i>                        | CAGAAGTACCTGAGCTCGCC    | GGTCGGAGATTCGTAGCTGG  |
| <i>INOS</i>                        | CAATGTGGAGAAAGCCCCCT    | GCTGCCCCAGTTTTTGATCC  |
| <i>IL6</i>                         | GGTCGGAGATTCGTAGCTGG    | ACATGTCTCCTTTCTCAGGGC |
| <i>TNFa</i>                        | GGCGTGGAGCTGAGAGATAA    | GCTCTTGATGGCAGAGAGGA  |
| <i>C3</i>                          | AAGTCCTCGTTGTCCGTTCC    | TGCGAACAGCCACAGTTTTG  |

|                                         |                          |                           |
|-----------------------------------------|--------------------------|---------------------------|
| <i>CXCL10</i>                           | CTGCCATTCTGATTTGCTGCC    | ACACGTGGACAAAATTGGCTT     |
| <i>SERPING1</i>                         | TCTCCTAACACTACCCCGCA     | GCTGCTGCACTTCAAAGACC      |
| <i>ARG1</i>                             | TTCACACCAGCTACTGGCAC     | CGAGCAAGTCCGAAACAAGC      |
| <i>IL10</i>                             | AAGACCCAGACATCAAGGCG     | ACTCATGGCTTTGTAGATGCCT    |
| <i>BDNF</i>                             | TGAGGACCAGAAAGTTCGGC     | CGCCGTTACCCACTCACTAA      |
| <i>GDNF</i>                             | GAAGTTATGGGATGTCGTGGCT   | TCCTCTGGCATATTTGAGTCACTG  |
| <i>CLCF1</i>                            | GACTCGTGGGGGATGTTAGC     | AGTCTGGCTCGTTGAAAGGG      |
| <i>S100A1</i>                           | TTCGCTGGGGATAAAGGCTAC    | AGCTCTGGAAGCCCACTTTG      |
| <i>CD109</i>                            | GAACACTGCCCTTCACAGGT     | CTGGGTACGTCCGGTTACAC      |
| <i>LCN2</i>                             | GACCCGCAAAGATGTATGCC     | GCTGGTTGTAGTTGGTGCTC      |
| <i>STEAP4</i>                           | AAGTCGGCAGGTGTTTGTGT     | ATTGGAATAGCTGCAGGGGG      |
| <i>OSMR</i>                             | TGTAAGCAAGCCAGAAGGGAC    | GCATACTGGGGCTTTTGGG       |
| <i>PSMB8</i>                            | GCCTTTAGATGACACGACCCT    | TCAATCACCTTGTTACCCGT      |
| <i>AMIGO2</i>                           | CTTCCATGCCAATGCACCAC     | CCACAGGCGACAGGTGTAAT      |
| <i>PTX3</i>                             | TGCCTGCATTTGGGTCAAAG     | GCCGCCAGTTCACCATTAC       |
| <i>TMEM119</i>                          | TTCTTCCGCCAGTACGTGAT     | TCTGTGCGGGACCTCACTG       |
| <b>qPCR Primer for Mouse Genes</b>      |                          |                           |
| Gapdh                                   | AACTTTGGCATTGTGGAAGG     | ACACATTGGGGGTAGGAACA      |
| Dnajc6                                  | CAGGCAGGCTCCAAGTCTAC     | CAGTCCAATTCCTGGTTCGCT     |
| <b>Primer for ChIP-qPCR</b>             |                          |                           |
| NURR1/FOXA2<br>on <i>DNAJC6</i> (I)     | AGTCGAAGCAGTGAGCAAGG     | TCTCCACTCTCCTTCCCTG       |
| NURR1/FOXA2<br>on <i>DNAJC6</i> (II)    | CGAGCAGTGATTGTGGGAGT     | GGACATTCTTTGGCTTGCCC      |
| NURR1/FOXA2<br>on <i>DNAJC6</i> (III)   | AACCAGATGTACAAATAAGTGGGC | GTCCATGGGAAAAGAATGTGGTC   |
| NURR1/FOXA2<br>on <i>DNAJC6</i><br>(IV) | CTTAGCTGGGAAGTCTAGGTCC   | ATGCATGTCATTGTGTTTACAAAGC |
| NURR1/FOXA2<br>on <i>DNAJC6</i> (V)     | CTGTAAAAGAGGACGGGCAACA   | GGTATATGCATGTGTGTGGCTAAA  |
| NURR1/FOXA2<br>on <i>DNAJC6</i><br>(VI) | AATGAGCCCAAGGTACGTGAAT   | AGGCTGCACTCTCATTTTGCTA    |
| <b>Primer for mtDNA Copy Number</b>     |                          |                           |
| <i>KCJN10</i>                           | GCGCAAAGCCTCCTCATT       | CCTTCCTTGGTTTGGTGGG       |
| <i>D-LOOP</i>                           | CATAAAGCCTAAATAGCCACACG  | CCGTGAGTGGTTAATAGGGTGATA  |

**Table S5. Postmortem brain tissue used in this study**

| <b>Phenotype</b> | <b>Age</b> | <b>Sex</b> | <b>Lewy body</b>        | <b>Motor symptom</b> | <b>Non-motor symptom</b> | <b>Pin#</b> |
|------------------|------------|------------|-------------------------|----------------------|--------------------------|-------------|
| Normal #1        | 83         | Female     | No                      | -                    | -                        | 20637       |
| Normal #2        | 83         | Female     | No                      | -                    | -                        | 20685       |
| Normal #3        | 69         | Male       | No                      | -                    | -                        | 10640       |
| PD #1            | 87         | Male       | Yes-diffuse/neocortex   | Yes                  | Not available            | 21220       |
| PD #2            | 88         | Female     | Yes-diffuse/neocortex   | Yes                  | Not available            | 20838       |
| PD #3            | 82         | Male       | Yes-limbic/transitional | Yes                  | Not available            | 20848       |

## Supplementary Figure legends

### **Suppl. Fig. S1. Gene Ontology (GO) and KEGG pathway analyses of differentially expressed genes (DEGs) in the datasets shown in Fig. 1C.**

(A) GO analysis of DEGs from dataset GSE68719, the primary dataset used in this study.

(B) Upregulated and downregulated KEGG pathways identified in additional PD-associated transcriptome datasets (GSE49036, GSE208783, ERP129142, and GSE207713).

### **Suppl. Fig. S2. Expression patterns of chaperone genes in the PD-associated datasets shown in Fig. 1C.**

(A) Expression levels of the selected chaperones DNAJC6, GAK, SYNJ1, and BAG3 in PD conditions compared with WT controls across the transcriptome datasets GSE49036, GSE208783, ERP129142 (GBA), ERP129142 (SNCA), and GSE207713.

(B) Scatterplots showing additional chaperone genes that are significantly upregulated or downregulated in PD compared with WT controls ( $p < 0.05$ ).

Upregulated and downregulated values (A) and genes (B) in PD are highlighted with green and yellow boxes, respectively.

### **Suppl. Fig. S3. Protocol summary for generating human brain cell cultures from human pluripotent stem cells (hPSCs).**

(A, B) Generation of midbrain cultures enriched with midbrain-type dopamine (mDA) neurons and astrocytes (mAST). hPSCs were differentiated into midbrain-like organoids in 3D culture. Neural stem/precursor cells (NSCs) were isolated from these organoids and expanded in 2D culture using NSC proliferation media across multiple passages. Early-passage NSCs (Passage 1–3, P1–3) predominantly differentiated into neurons, including mDA neurons, while late-passage NSCs (P8–10) primarily produced mAST. Midbrain cultures enriched for neurons, mixed neurons/astrocytes, or astrocytes were prepared using NSCs from passages P1–3, P4–6, and P8–10, respectively. The regional and cell-type identities of the cultures were validated by immunocytochemistry for midbrain DA neuronal markers (e.g. NURR1, FOXA2, EN1, TH), and astrocyte-specific markers (e.g., GFAP, S100 $\beta$ , AQP4).

(C–E) Derivation of microglia-like cells from hPSC-derived yolk sac (hematopoietic) organoids.  
(C) Representative images of Iba1+, TMEM119+, and CX3CR1+ microglia-like cells.  
(D) Confirmation of microglial phenotypic identity through qPCR analysis of microglia-specific markers.  
(E) Functional validation of microglia-like cells by demonstrating upregulation of pro-inflammatory genes in response to stimuli such as LPS and IL-4.

**Suppl. Fig. S4. Quantification of the numbers of DA neurons (A), synapses (B), and NURR1 and FOXA2 expression (C) in the toxin-treated cultures used in Fig. 1G.**

NURR1 and FOXA2 expression in (C) was assessed by mean fluorescence intensity (MFI) using ImageJ. \*  $p > 0.05$ , one-way ANOVA followed by dunnett's test.

n = 6-9 cultures for (A); 60-120 TH<sup>+</sup> neurites (from 6-9 cultures) for (B); 40-90 cells (from 6-9 cultures) for (C).

**Suppl. Fig. S5.** Rank-ordered data of Nurr1- and Foxa2-induced gene expression changes in primary mouse NSC (mNSC) and glial (mGlia) cultures (microarray datasets GSE54086 and GSE145489).

**Suppl. Fig. S6.** Treatment with  $\alpha$ -syn PFF in hPSC-derived human midbrain cultures led to downregulation of the midbrain-specific transcription factors NURR1 and FOXA2 (A-B). Expression was assessed by the percentage of immunoreactive cells among total (DAPI+) cells (A) or by the mean fluorescence intensity (MFI) of each cell (B). (C) Immunoblot analysis showing the recovery of  $\alpha$ -syn PFF treatment-induced DNAJC6 protein loss upon forced expression of NURR1 and FOXA2 in hESC-derived midbrain cultures. \* $p < 0.05$ , \*\* $p < 0.01$ , unpaired t-test (A) or one-way ANOVA followed by Tukey's post hoc analysis (B). NS, Not Significant.

**Suppl. Fig. S7. Co-IP assay showing that the LRRK2 K1906M variant, a non-pathogenic kinase-dead form, does not induce serine phosphorylation of DNAJC6 proteins.** This

experiment serves as a negative control for the WT LRRK2-mediated serine phosphorylation of DNAJC6 shown in Fig. 2K.

**Suppl. Fig. S8.** The expression level of DNAJC6 was analyzed in human neurons, astrocytes and microglia cultures derived from hESCs. The expression levels in each cell type were determined using immunocytochemical (A) and qPCR analyses (B). \* $p < 0.05$ , \*\* $p < 0.01$ , \*\*\* $p < 0.0001$ ;  $n = 32$  cells (A) and 3 independent experiments (B) NS, Not Significant.; One-Way ANOVA followed by Dunn's test (A) or Tukey's test (B).

**Suppl. Fig. S9.** (A) Scatterplot analysis of differentially expressed genes (DEGs) in astrocytes derived from isogenic LRRK2G2019S-hiPSCs compared to WT hiPSC-astrocytes (GSE207713). The arrow indicates the position of DNAJC6 among the downregulated DEGs. (B) Gene ontology (GO) analysis of downregulated DEGs in LRRK2G2019S astrocytes compared to WT astrocytes.

**Supple Fig. S10. PINK1 and Parkin levels in the mitochondrial fractions analyzed by WB.** PINK1 and Parkin levels in the mitochondrial fractions analyzed by immunoblot (left blots) and the protein levels were analyzed (right).

**Suppl. Fig. S11. Determination of mitochondrial DNA (mtDNA) levels and MAVS activation**

(A) Detection of cytosolic mitochondrial DNA (mtDNA).

(B, C) MAVS activation assessed through Western blot for aggregated MAVS protein levels (B) and immunocytochemistry (C). \* $p < 0.05$ , NS, Not Significant,  $n = 3 \sim 4$ .

**Supple Fig. S12.** The *in vitro* human PD tri-culture model used in this study. (A) Schematic overview of the procedure for generating the *in vitro* human PD tri-culture model. (B)

Pathological misfolded  $\alpha$ -syn aggregation by  $\alpha$ -syn-Western Blot (WB) using Triton X-100-soluble and insoluble fractions.

(C, D) Misfolded  $\alpha$ -syn aggregation propensity measured by the percentage of Thioflavin S-stained cells (C) and % pS129- $\alpha$ -syn+/TH+ cells (D).

(E) Synaptic degeneration assessed by the number of abnormal synaptic vesicle clusters ( $>5\mu\text{m}$  synapsin+ clumps).

(F) Astrocyte viability assessed by % GFAP+ cells of DAPI+ cells

\* $p < 0.05$ , \*\* $p < 0.001$ ; Paired t-test (B), Unpaired t-test (C).

**Suppl. Fig. S13. Astrocytic DNAJC6 knockdown (KD) effects in mDA neuron–astrocyte dual co-cultures (lacking microglia).** (A) WB analysis for detecting pathological a-syn aggregates. (B) % Thioflavin S-stained cells. (C) % pS129- $\alpha$ -syn+/TH+ cells. (D) Synaptic degeneration assessed by the number of abnormal synaptic vesicle clusters ( $>5\mu\text{m}$  synapsin+ clumps). \* $p < 0.05$ ; Paired t-test (A), Unpaired t-test (B-D).

**Suppl. Fig. S14. Astrocytic DNAJC6-KD effects on microglia.** (A, B) DNAJC6-KD astrocytes (or control astrocytes) were co-cultured with human microglia in the presence of a-syn PFF. Pro-inflammatory and senescence phenotype of the microglia were assessed by % Iba1+ microglia expressing IL1 $\beta$  and P21(A) and mRNA expression levels of pro-inflammatory cytokines (B). (C) Medium was conditioned in the cultures for DNAJC6-KD astrocytes (or control astrocytes) and the conditioned media (CM) were treated to a-syn PFF-treated microglia cultures. The percentage of Iba1+ microglia expressing IL1 $\beta$  and P21 were assessed. \* $p < 0.05$ ; Unpaired t-test.

**Suppl. Fig. S15. Comparison of DNAJC6 expression levels and cell toxicity induced by conventional universal promoter-driven and CRISPRa-mediated lentiviral transduction.**

(A) Schematic representation of the vector constructs.

(B) DNAJC6 exogenous expression levels quantified by qPCR in human neuron- and astrocyte-enriched cultures derived from hESCs.

(C) Cellular toxicity comparison, measured as the percentage of EtHD+ dead cells.

\* $p < 0.05$ , \*\* $p < 0.01$ , \*\*\* $p < 0.0001$ , NS, Not Significant;  $n=3$ , Unpaired t-test

**Suppl. Fig. S16. Therapeutic effects of neuron-specific CRISPRa-DNAJC6 on  $\alpha$ -syn-PD pathologies in an *in vitro* model.**

(A) Schematic representation of the experimental procedure (B).

(B–E) Pathological misfolded  $\alpha$ -syn aggregation analyzed by  $\alpha$ -syn Western blot (WB) using Triton X-100-soluble and insoluble fractions (B) and immunocytochemistry (ICC) for the percentage of Thioflavin S-stained cells (C) and pS129- $\alpha$ -syn<sup>+</sup>/TH<sup>+</sup> cells (D) and synaptic vesicle clustering, quantified as the number of synapsin I<sup>+</sup> clumps >5  $\mu$ m (E). \*p < 0.05, \*\*p < 0.001; paired t-test (B) or unpaired t-test (C–E).

**Suppl. Fig. S17. Effects of DNAJC6 overexpression in both neuronal and astrocytic cells on  $\alpha$ -syn aggregation and synaptic degeneration in DA neurons, compared with overexpression in either cell type alone.**

(A) Percentage of Thioflavin S-positive cells.

(B) Percentage of pS129- $\alpha$ -syn<sup>+</sup>/TH<sup>+</sup> cells.

(C) Synaptic vesicle clustering, quantified as the number of synapsin I<sup>+</sup> clumps >5  $\mu$ m.

\*p<0.05 compared to PD-control, Two-way ANOVA followed by Tukey's analysis.

**Suppl. Fig. S18. Morphometric analysis of astrocytes (A) and microglia (B) in the midbrain SNs of WT and  $\alpha$ -syn PD mice with CRISPRa-mediated DNAJC6 overexpression.**

Representative images of GFAP<sup>+</sup> astrocytes (A) and Iba1<sup>+</sup> microglia (B) are shown alongside quantitative assessments of morphometric parameters.

A total of 40-70 astrocytes (A) and 30-60 microglia (B) were analyzed from 3-5 mice.

\*p<0.05, \*\*\*\*p<0.0001, One-way ANOVA followed by Bonferroni post hoc analysis.

**Suppl. Fig. S19.** CRISPRa-mediated overexpression of DNAJC6 in WT mice did not affect behavior (A) or SN histology (B), supporting the safety of this approach.

**Suppl. Fig. S20. Expression levels of chaperone genes in in vitro and in vivo  $\alpha$ -syn-PD models with or without DNAJC6 rescue.**

qPCR analysis was performed to assess the expression of various chaperones in  $\alpha$ -syn-treated hPSC-derived midbrain neuron-astrocyte cocultures (A) and in  $\alpha$ -syn-treated mouse midbrain

tissues (B), representing the in vitro and in vivo PD models, respectively. The effects of CRISPRa-mediated DNAJC6 rescue on chaperone expression were also evaluated.

All data were not significantly different among WT, PD, and PD+CRISPRa, One-way ANOVA followed by Bonferroni post hoc analysis.

# Figure S1.

A

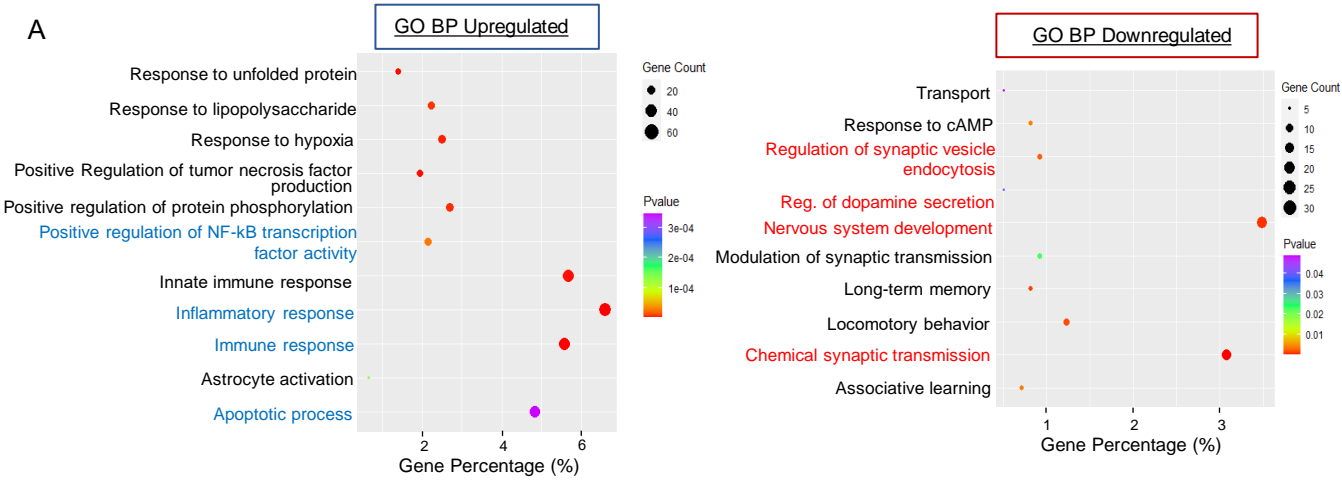

B

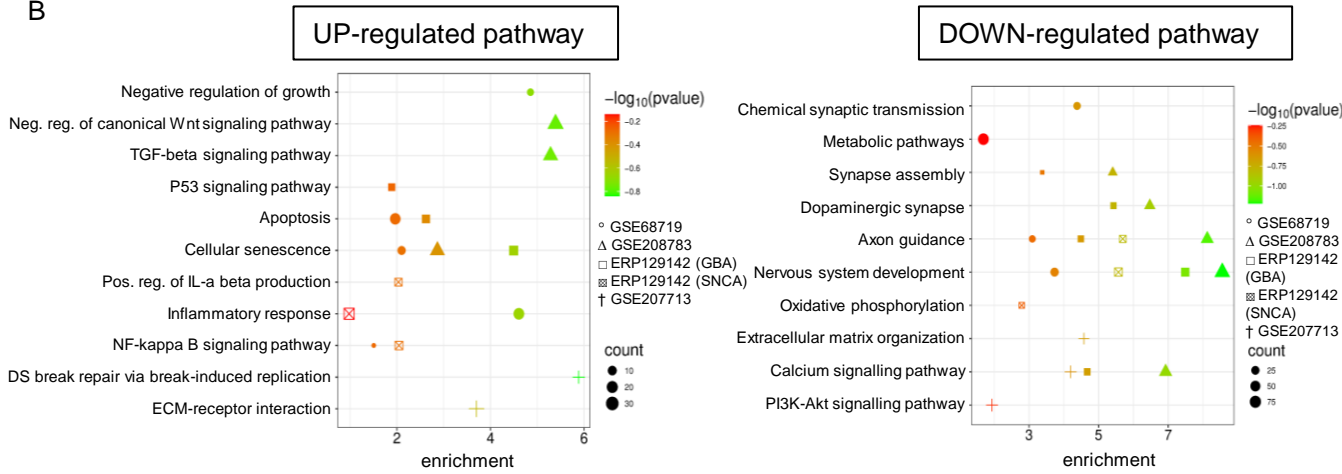

# Figure S2.

A

Upregulated  
Down-regulated

| <i>DNAJC6</i> | log2FC       | p value  | <i>GAK</i> | log2FC   | p value  | <i>SYNJ1</i> | log2FC       | p value  | <i>BAG3</i> | log2FC   | p value  |
|---------------|--------------|----------|------------|----------|----------|--------------|--------------|----------|-------------|----------|----------|
| GSE68719      | -0.35        | 0.002    | GSE68719   | 0.214794 | 0.005435 | GSE68719     | -0.211579222 | 0.063291 | GSE68719    | 1.02947  | 6.13E-07 |
| GSE208783     | -2.138319482 | 4.76E-12 | GSE208783  | 0.658784 | 1.79E-05 | GSE208783    | -0.849841168 | 4.15E-09 | GSE208783   | 0.280243 | 0.017912 |
| ERP_GBA       | -0.4         | 0.001778 | ERP_GBA    | 0.1      | 0.708612 | ERP_GBA      | -0.1         | 0.575821 | ERP_GBA     | 0.2      | 0.538202 |
| ERP_SNCA      | -0.3         | 1.15E-06 | ERP_SNCA   | 1.1      | 1.47E-23 | ERP_SNCA     | -0.5         | 3.42E-10 | ERP_SNCA    | -0.3     | 0.063122 |
| GSE207713     | -0.79814742  | 0.023461 | GSE207713  | 0.060424 | 0.530486 | GSE207713    | 0.086985892  | 0.774664 | GSE207713   | -0.48985 | 0.084142 |

B

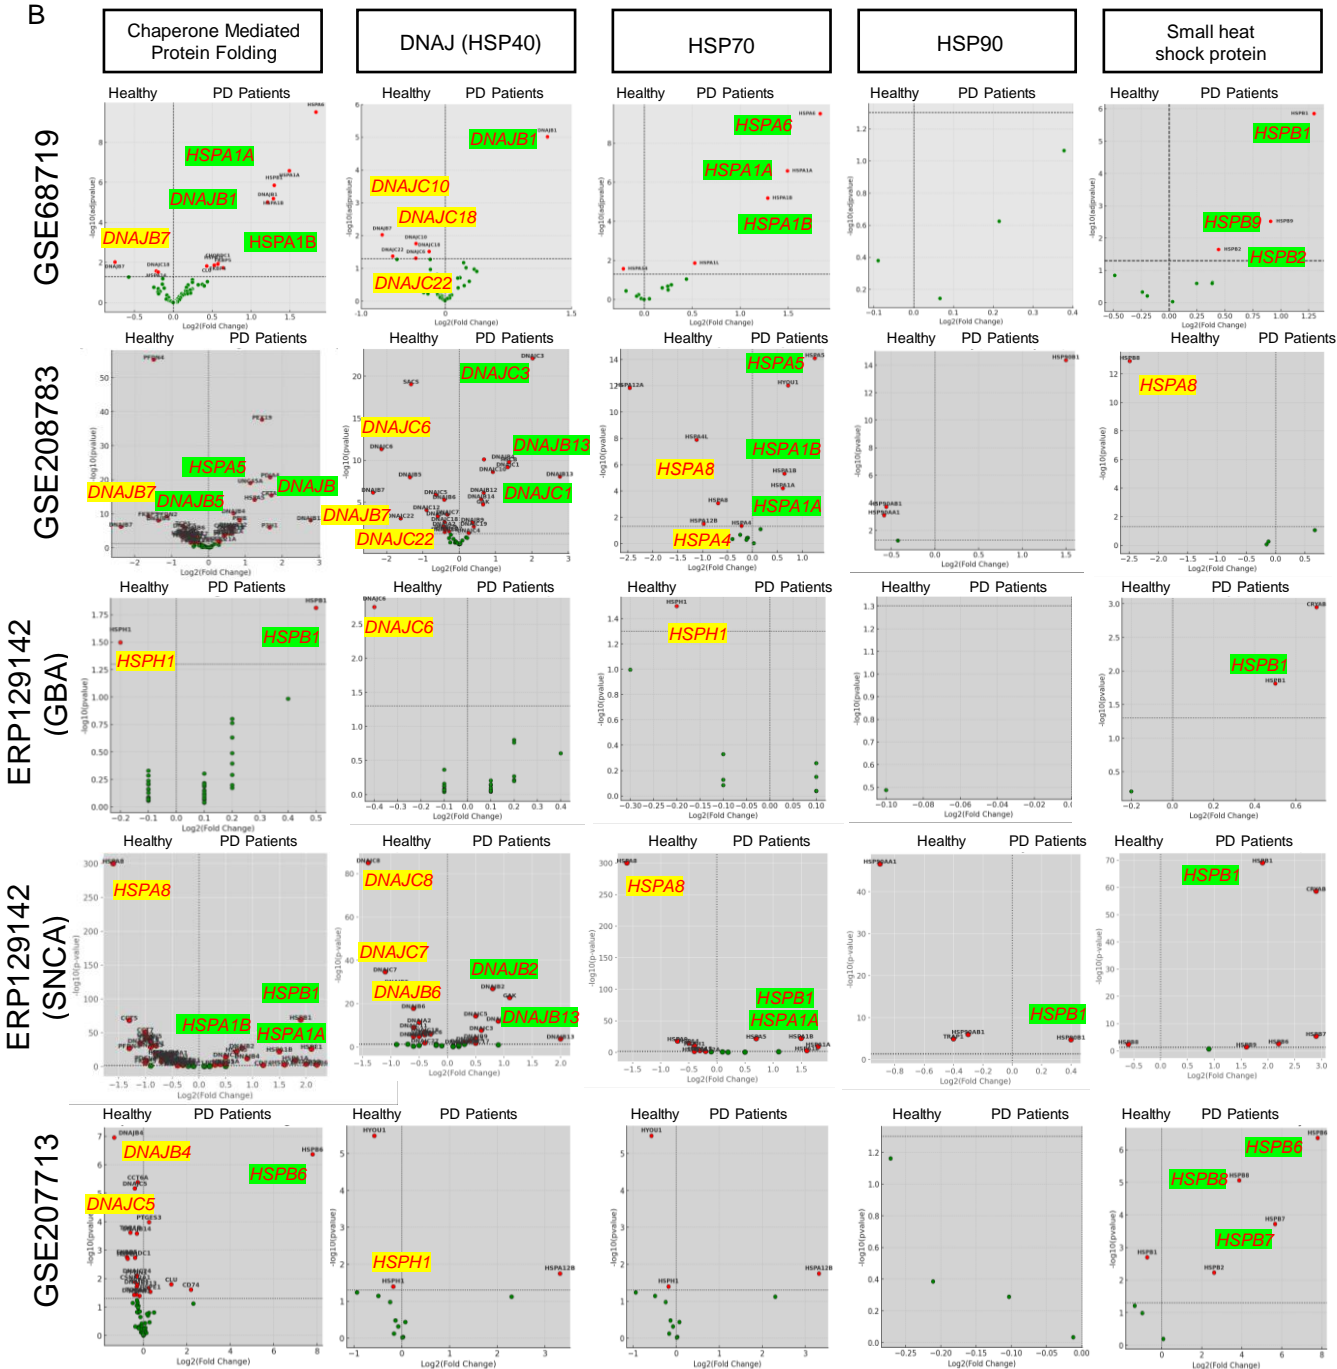

Figure S3.

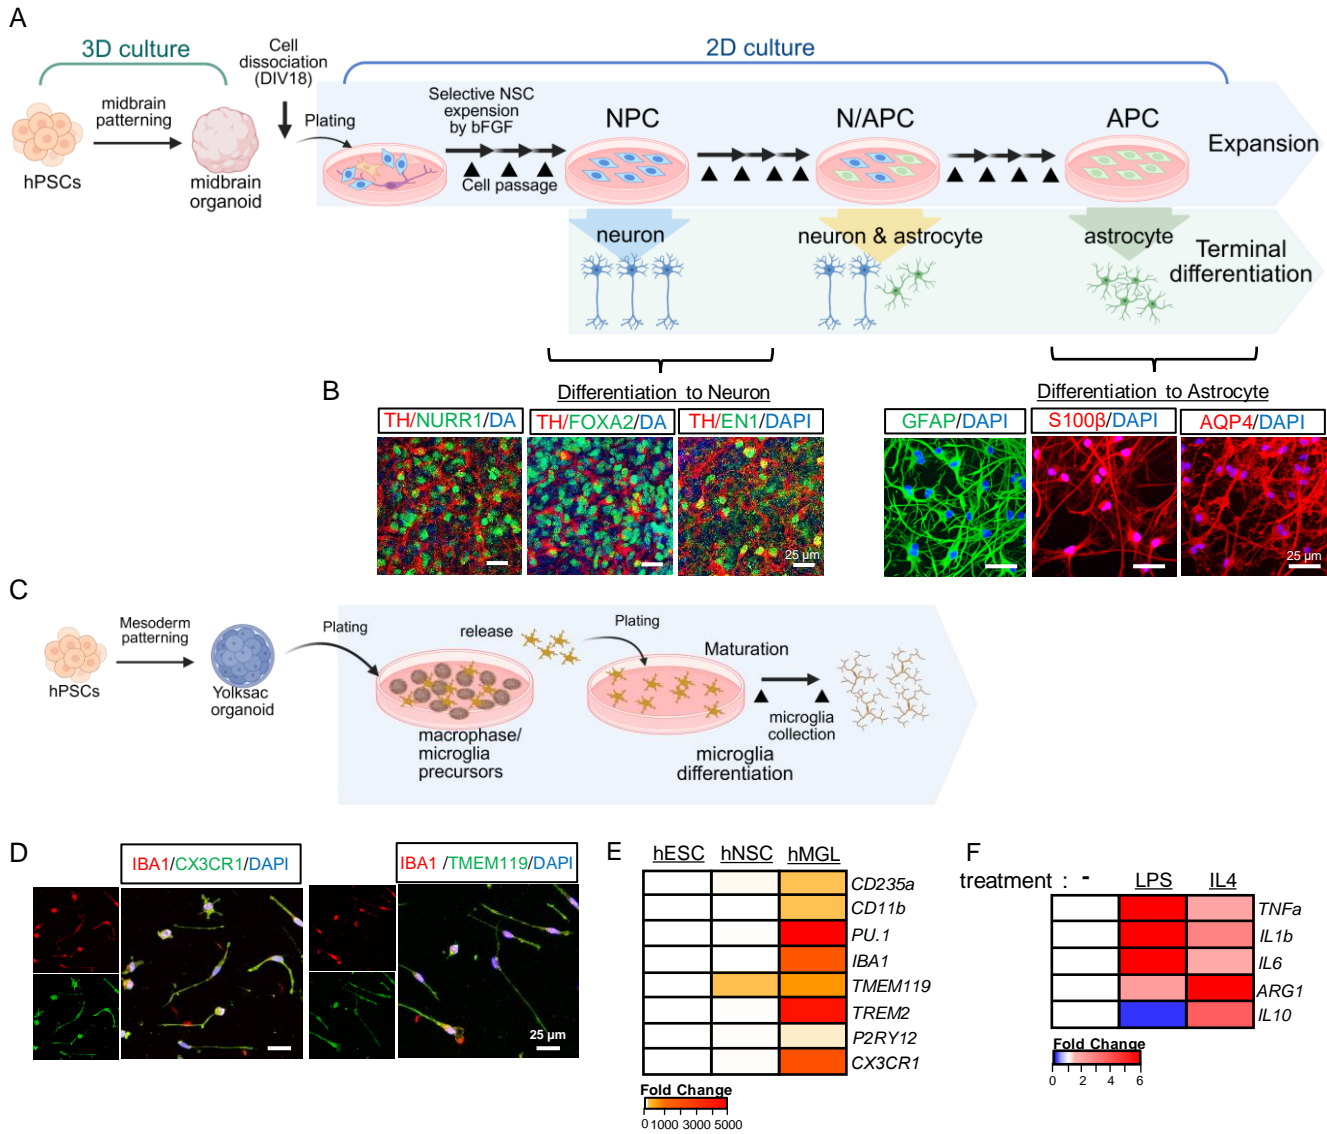

Figure S4.

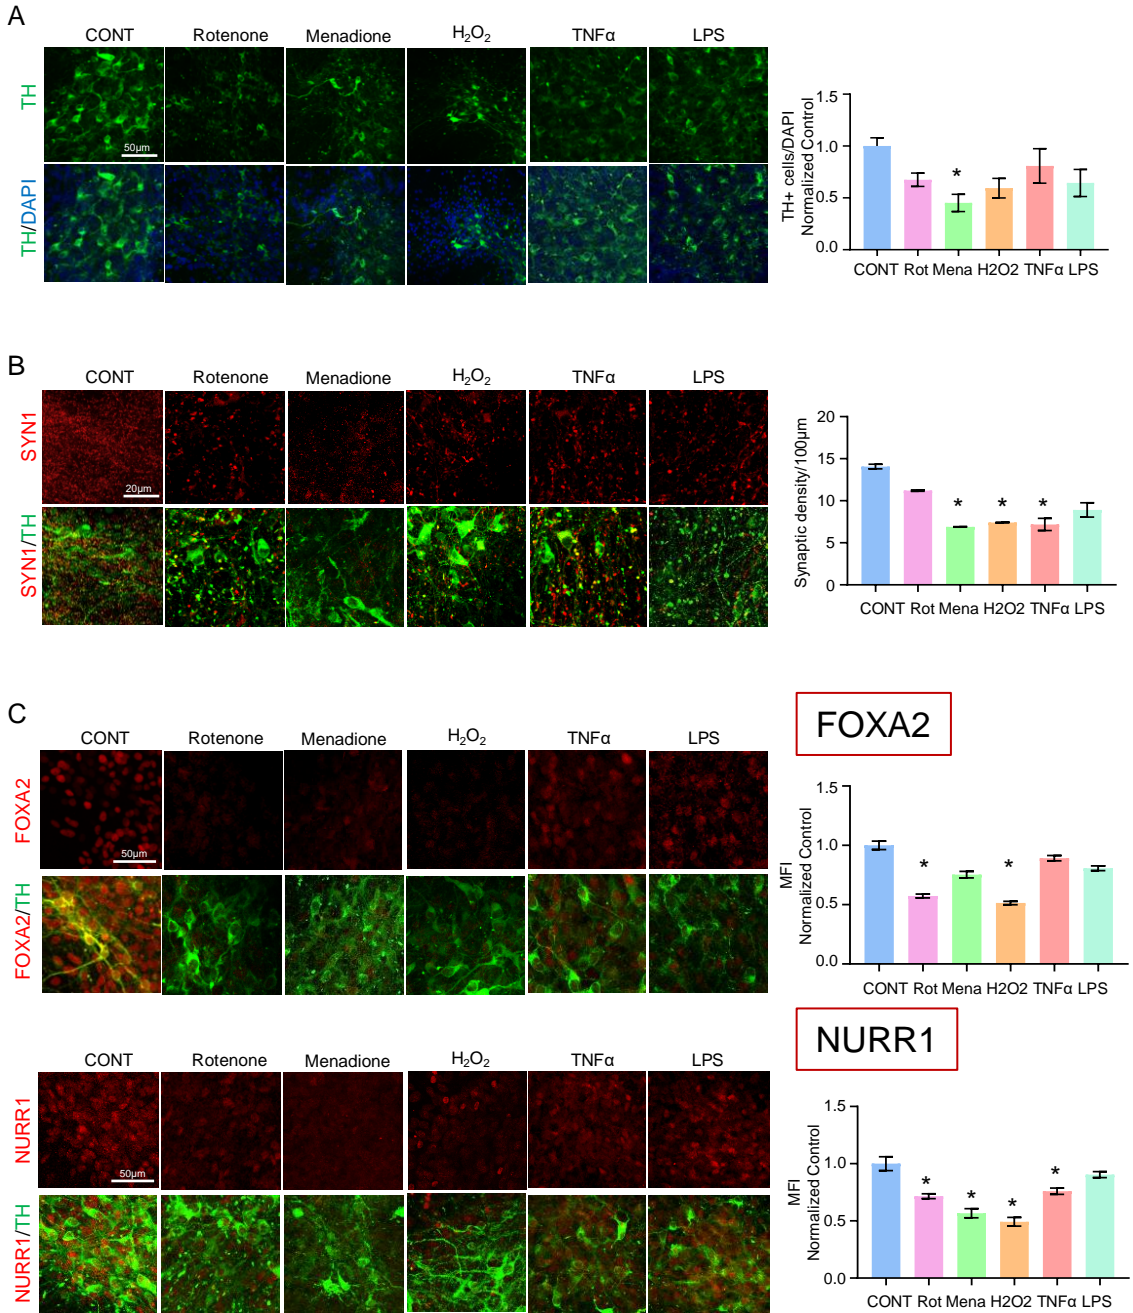

Figure S5.

GSE54086

*Nurr1+Foxa2* vs Control

■ Upregulated  
■ Downregulated

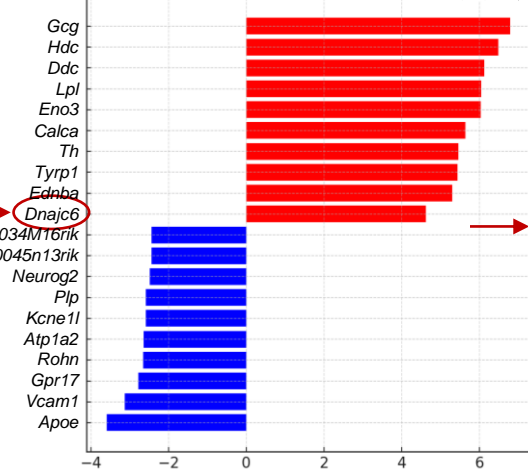

GSE145489

*Nurr1+Foxa2* vs Control

■ Upregulated  
■ Downregulated

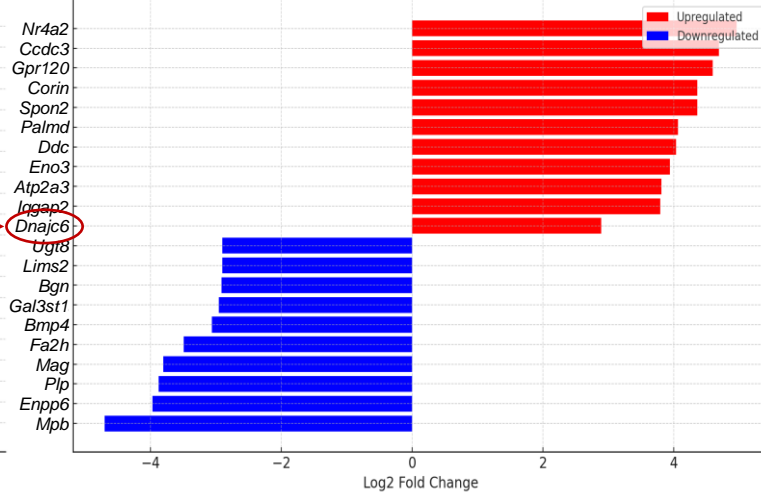

Figure S6.

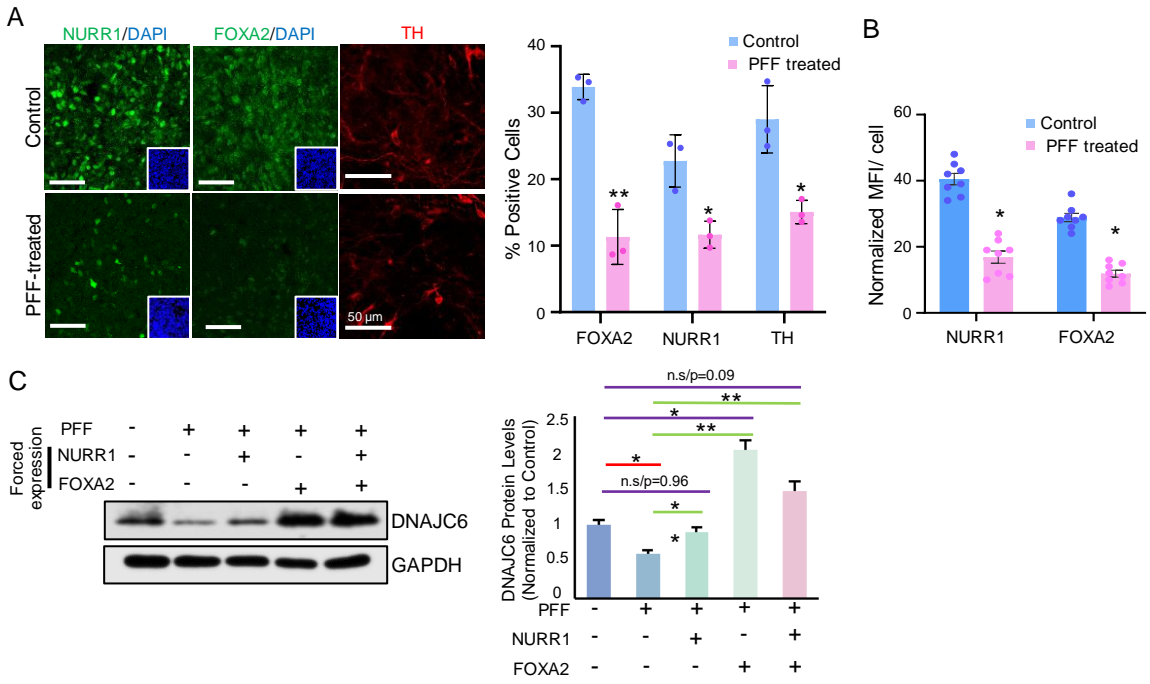

Figure S7.

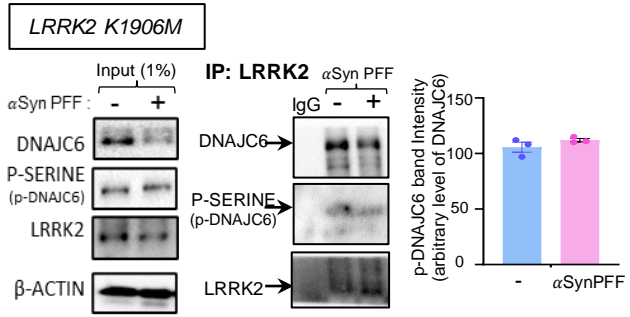

Figure S8

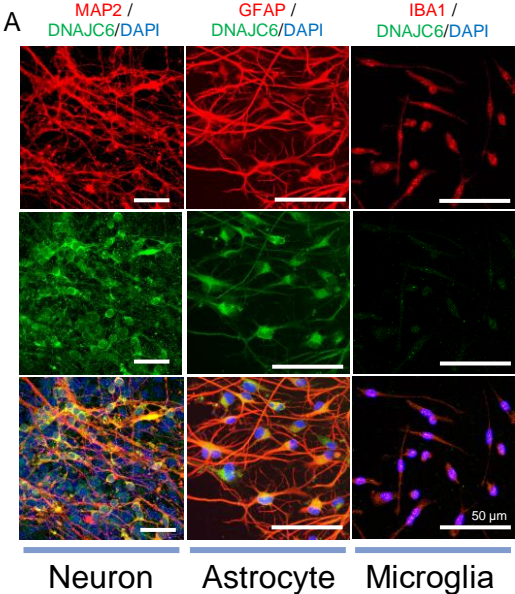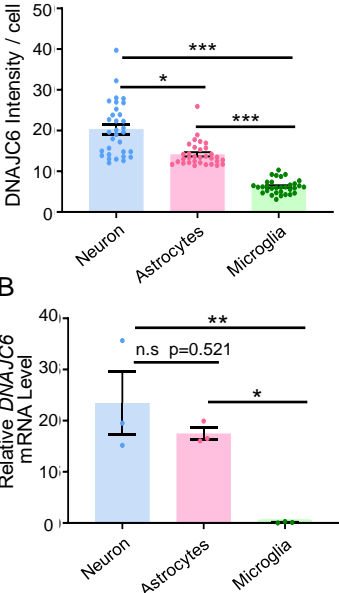

Figure S9.

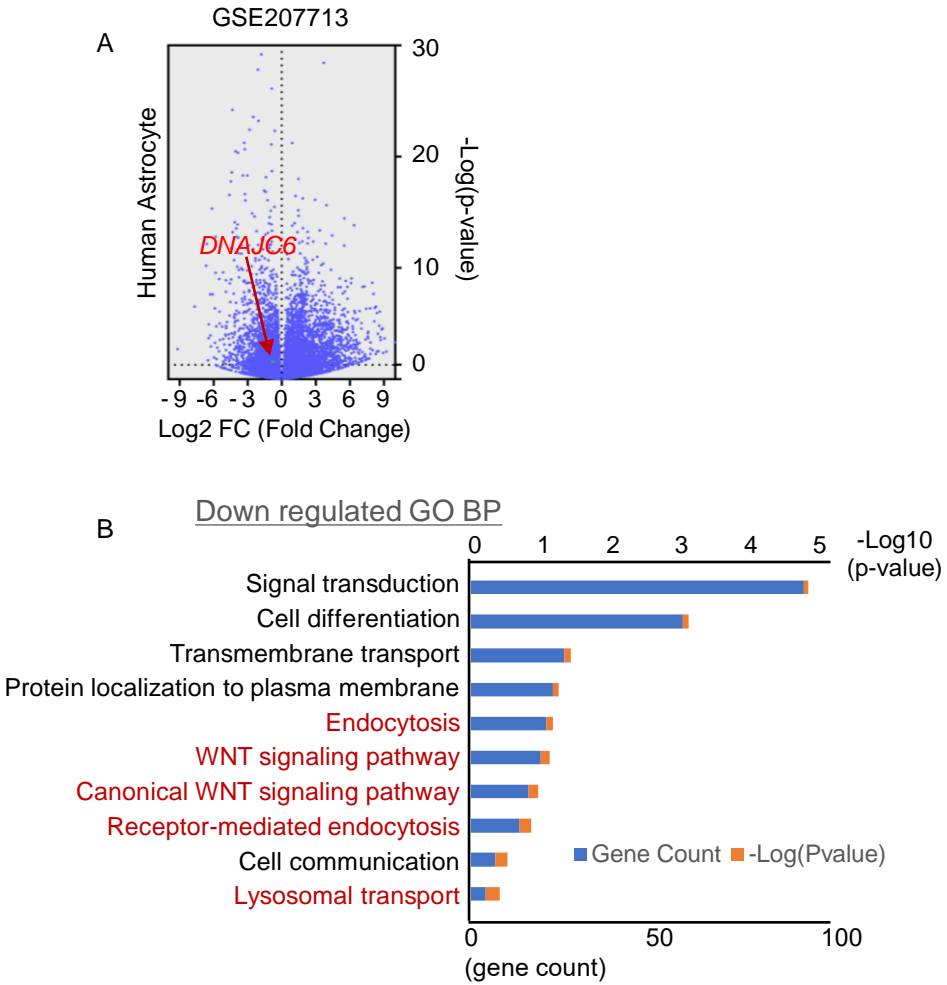

Figure S10.

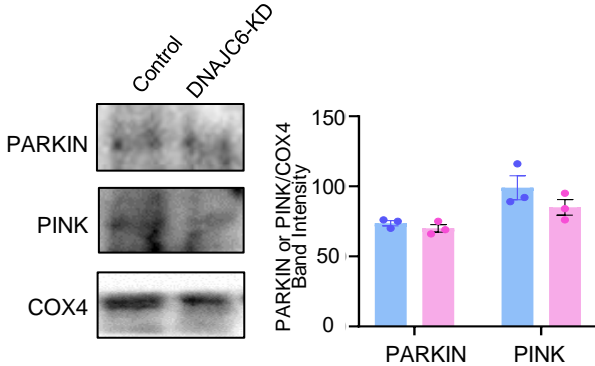

# Figure S11.

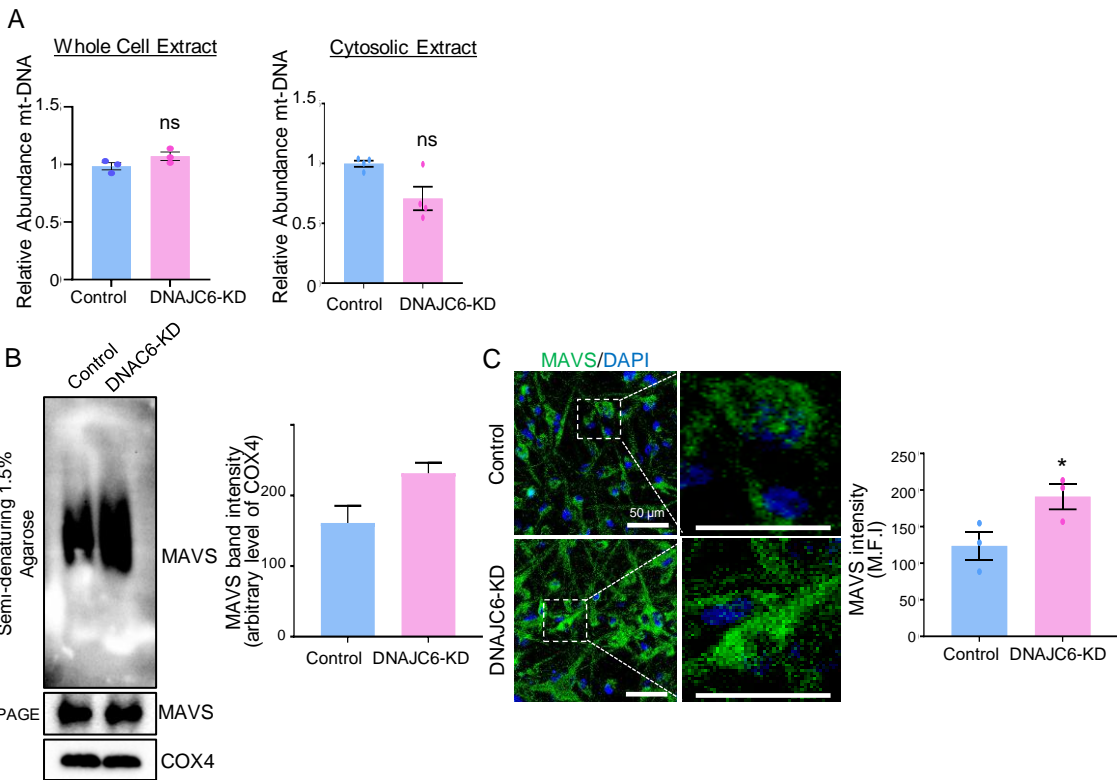

Figure S12.

A

PD *in-vitro* Tri-culture model:

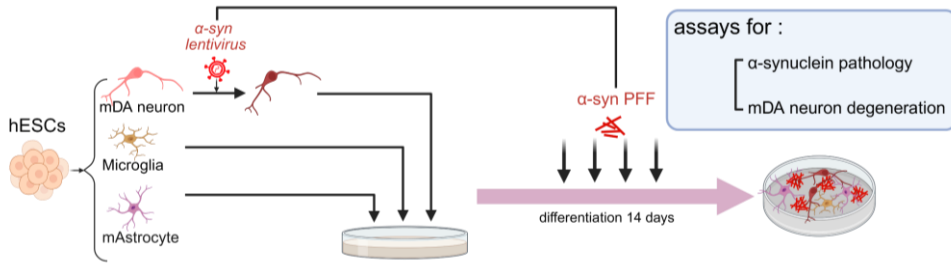

B

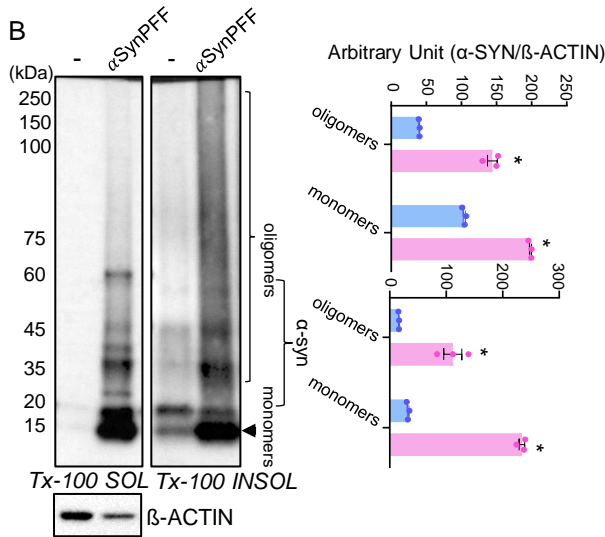

C

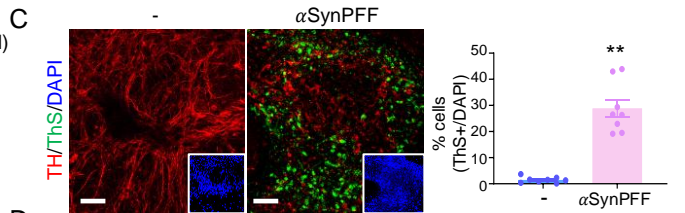

D

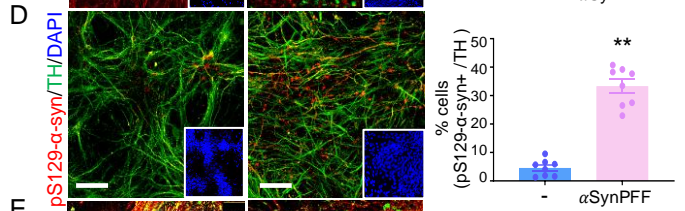

E

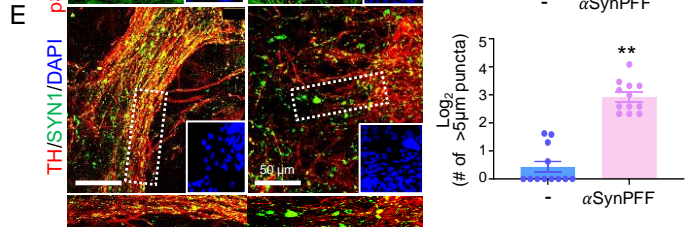

F

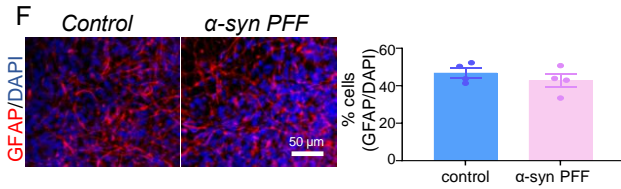

Figure S13.

A

$\alpha$ -syn PFF treated -Neu+Ast dual culture

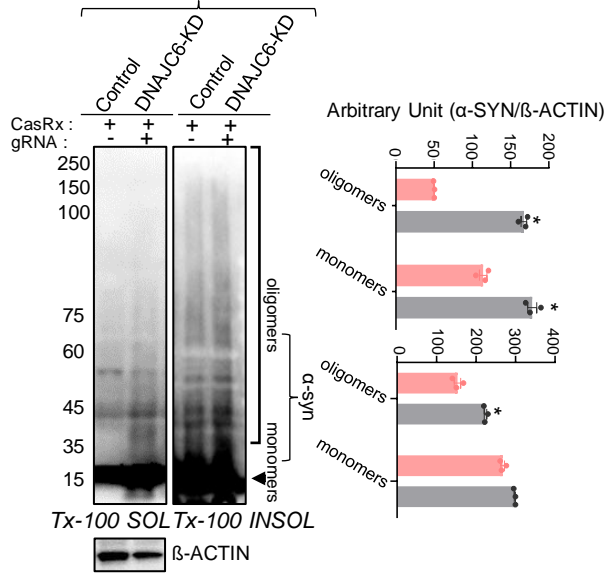

$\alpha$ -syn PFF treated -Neu+Ast dual culture

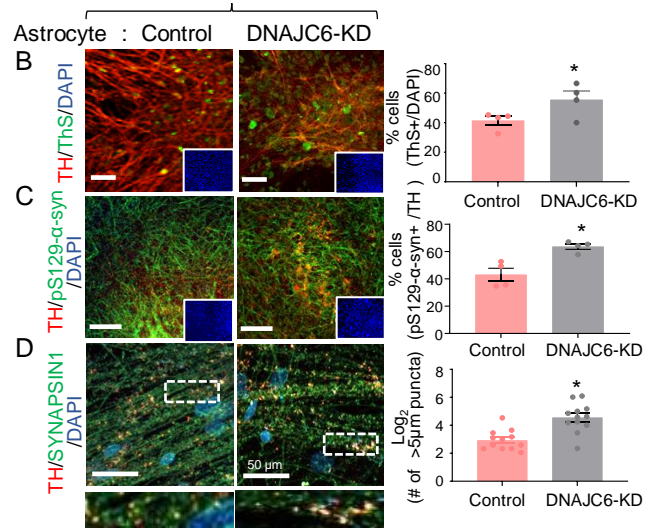

# Figure S14.

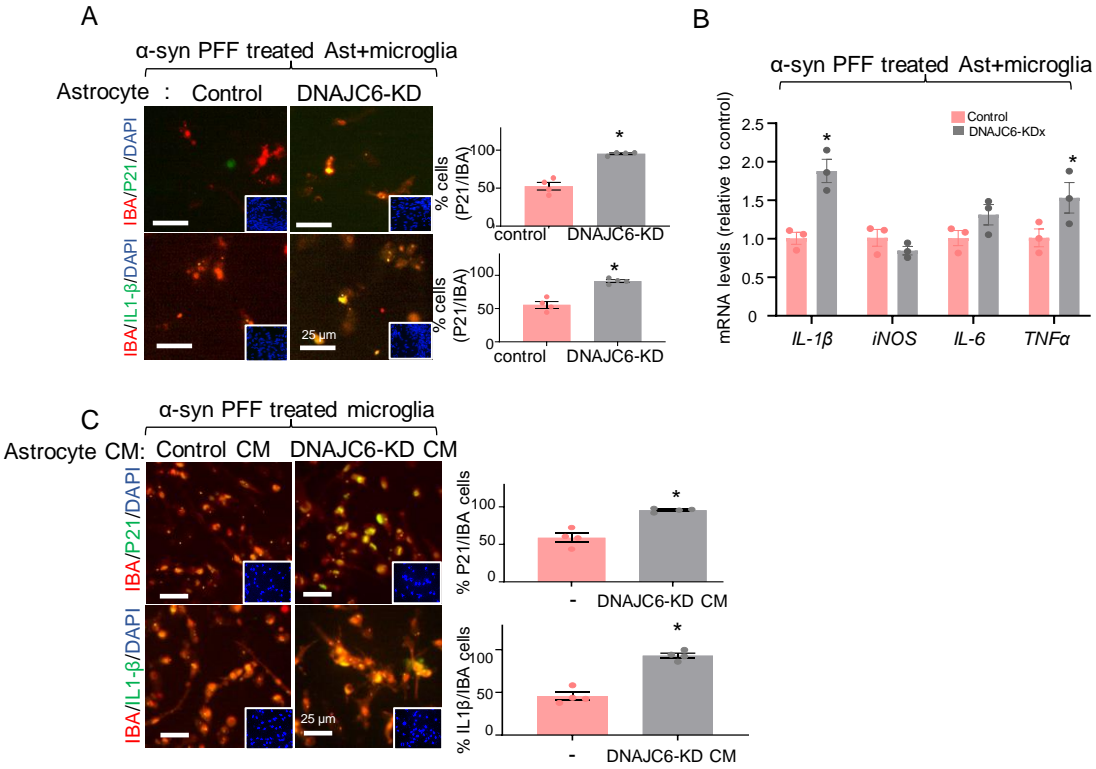

Figure S15.

A

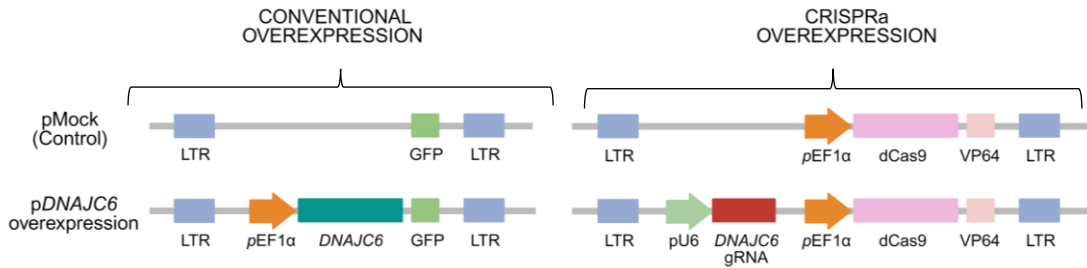

B

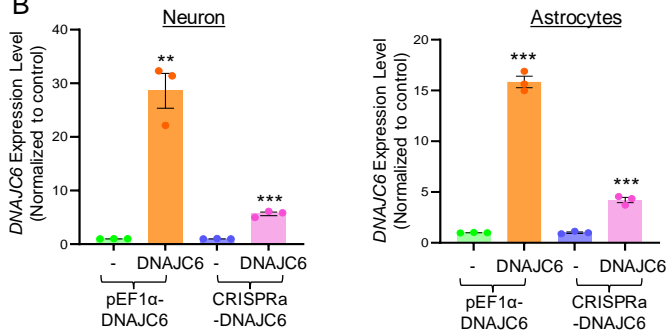

C

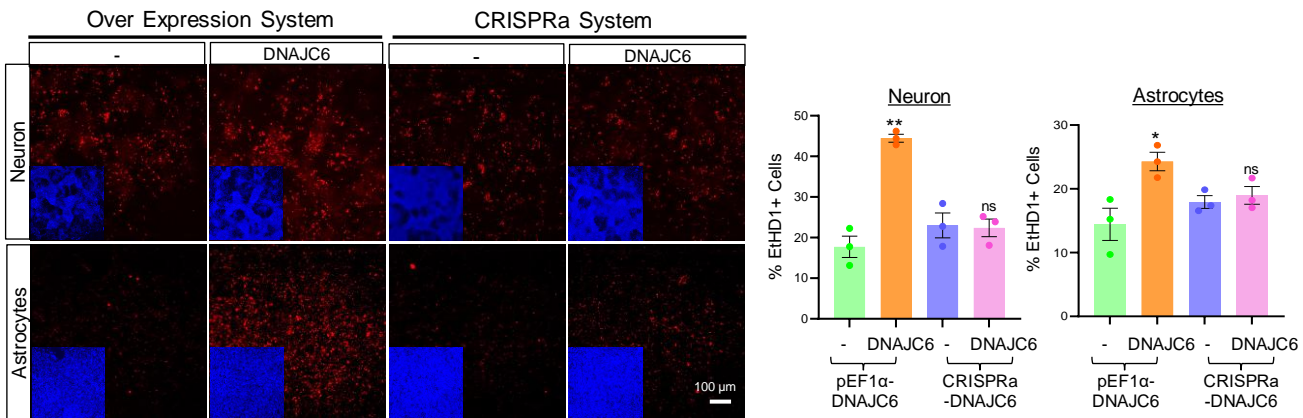

Figure S16.

A

PD *in-vitro* Tri-culture model:

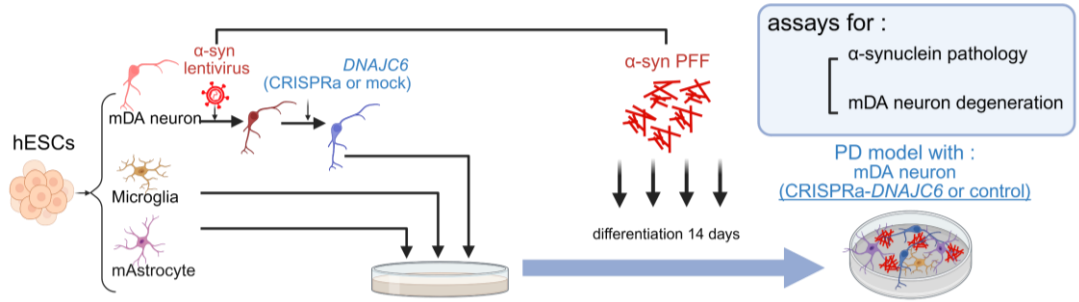

B

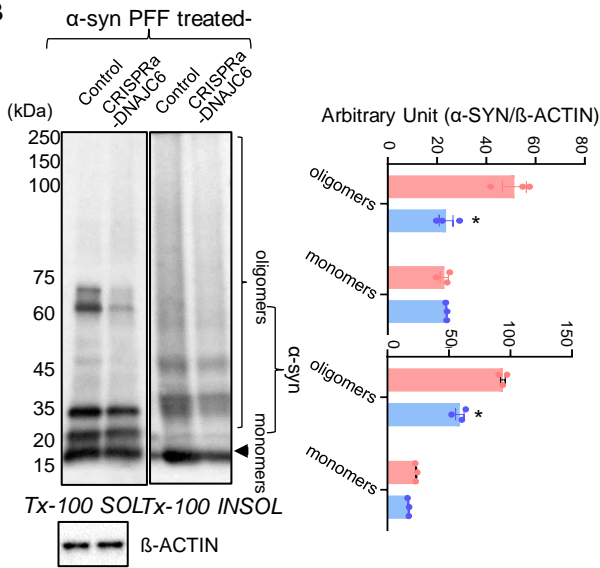

$\alpha$ -syn PFF treated-

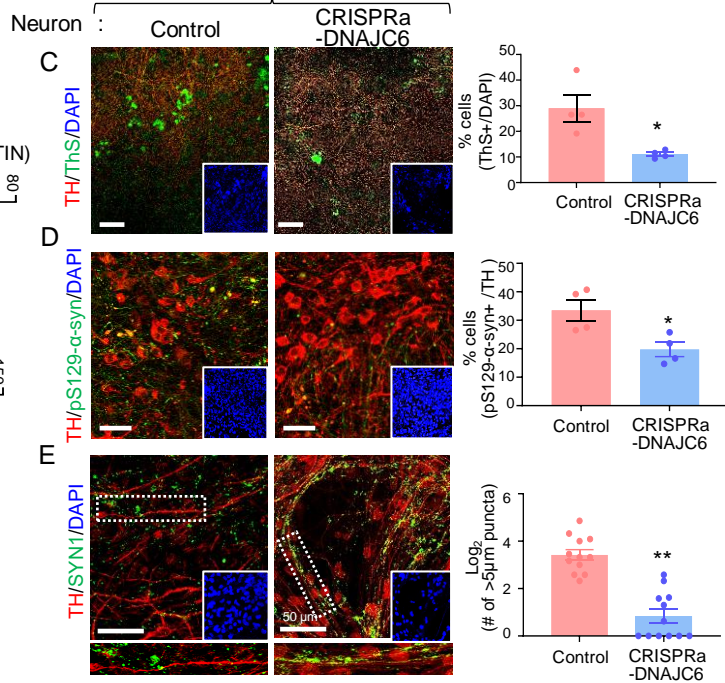

Figure S17.

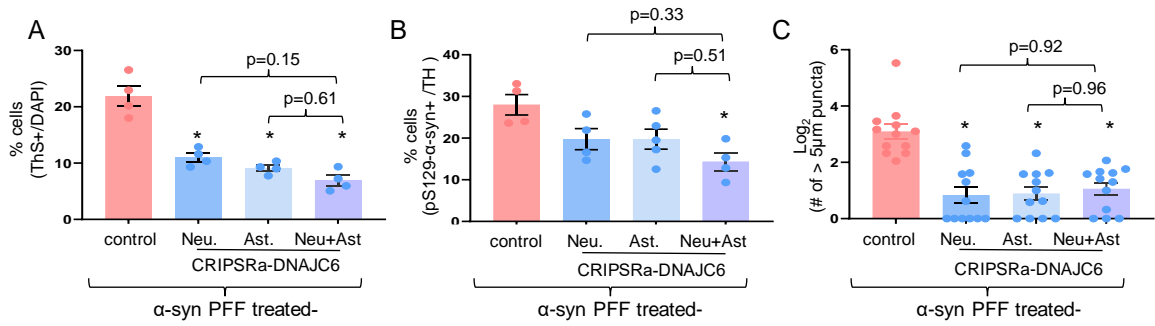

Figure S18.

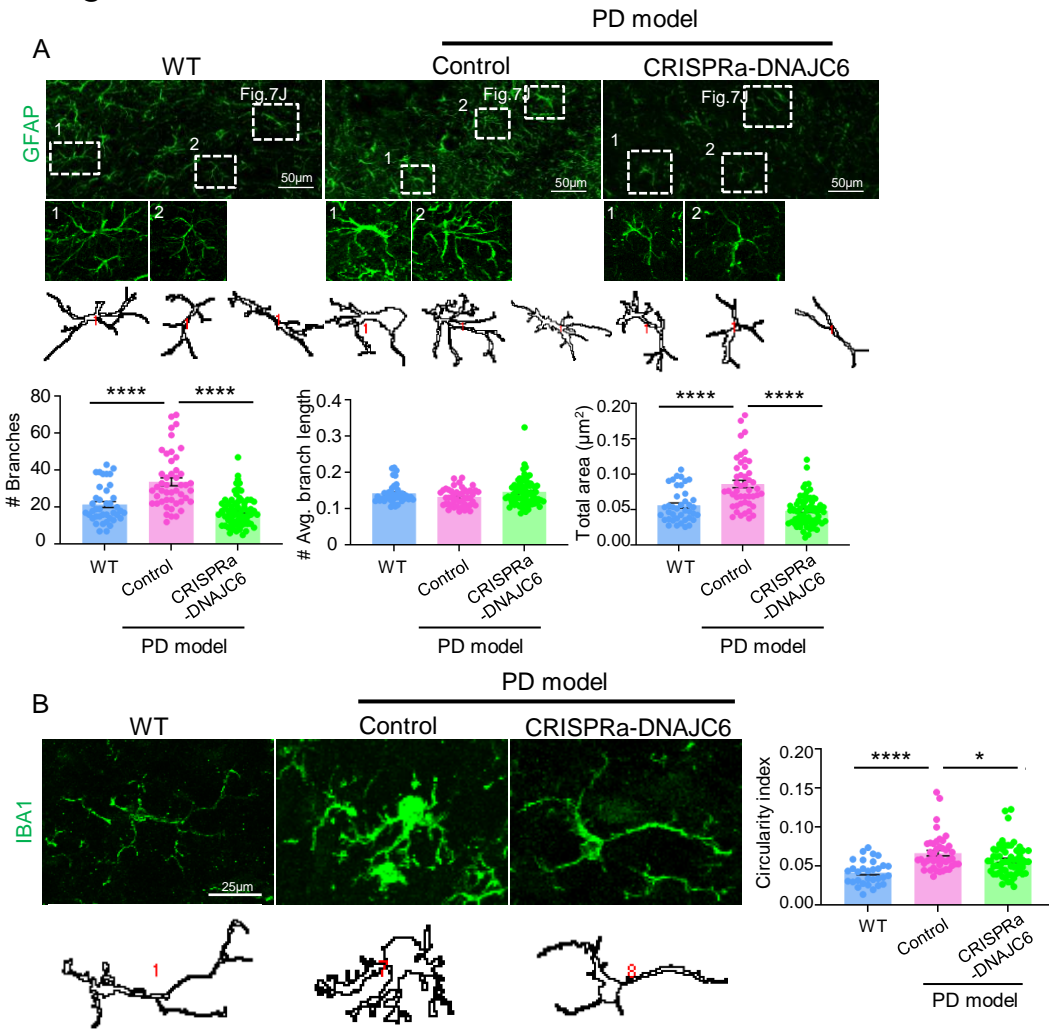

Figure S19.

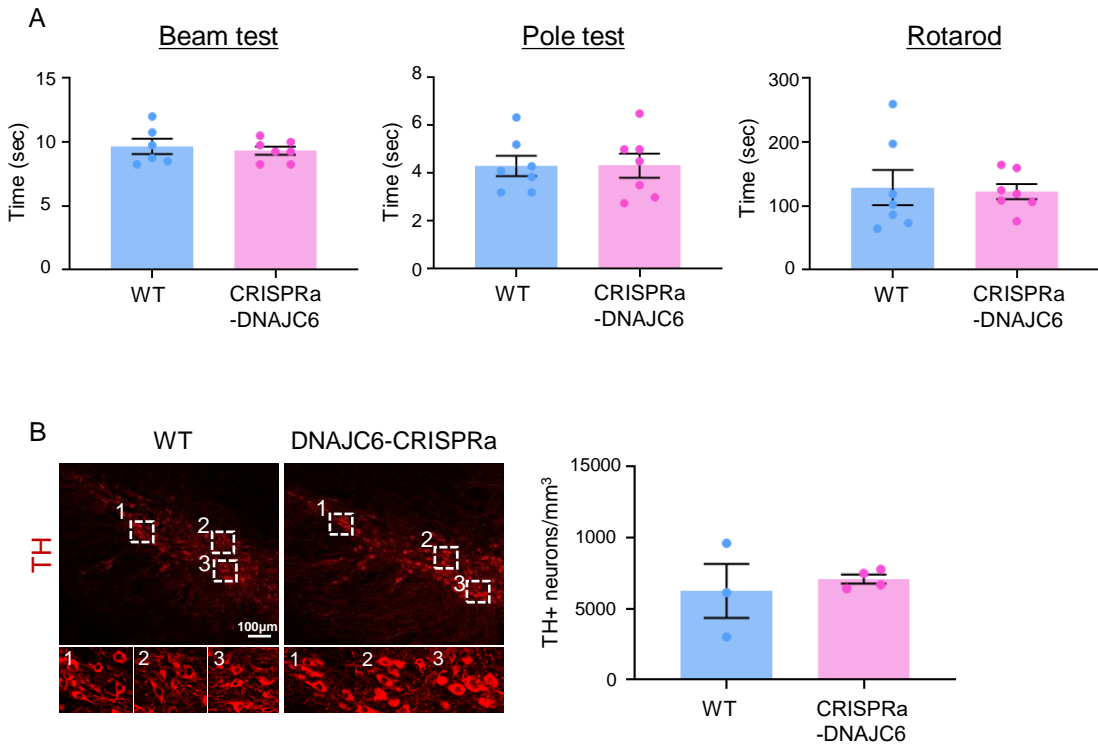

Figure S20.

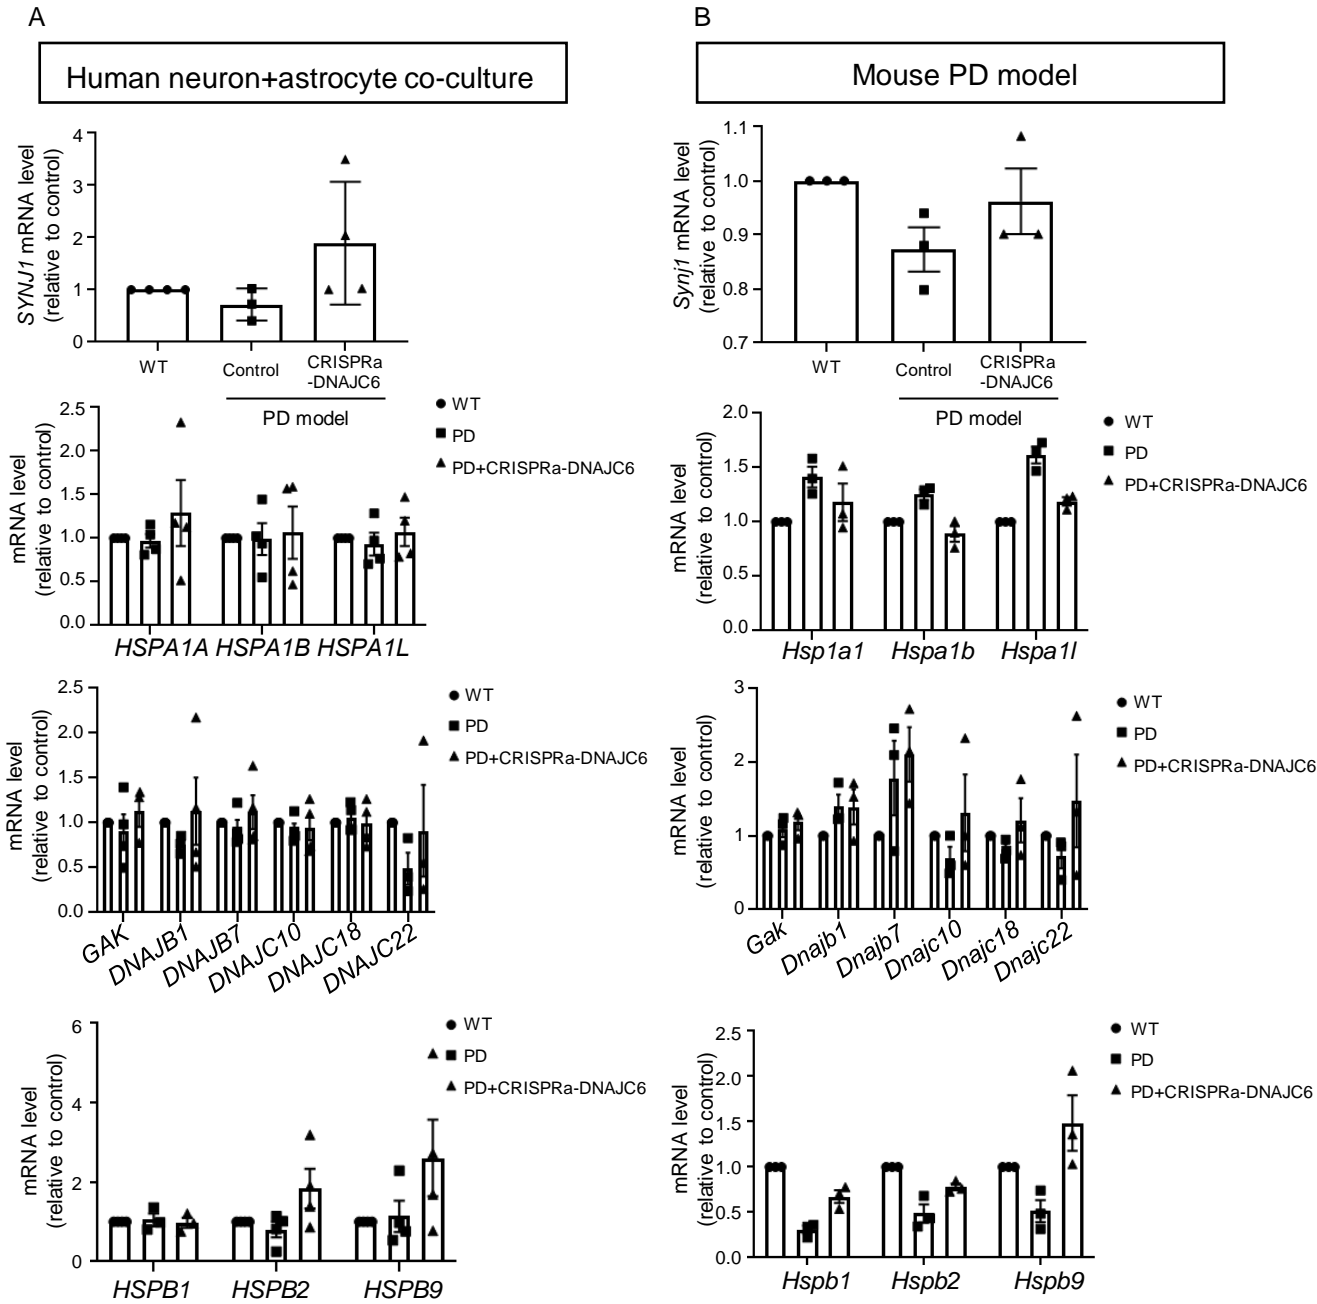

Supplement: sd1 [file 1]
